# Supplementary material
Source: PubMed Central journal article supplement (PMC5947449)

Supplemental Figure for:  
Chemotherapy Toxicity Risk Score (CTRS) for Treatment Decisions in Older Adults with Advanced Solid Tumors  
Tomohiro F. Nishijima et al.

Figure S1. A flow diagram of the study.

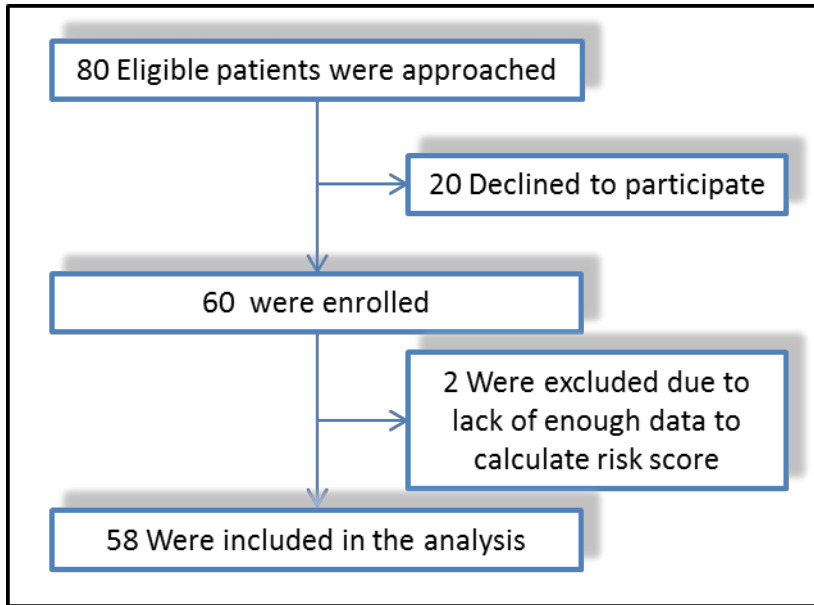

Supplement: supp_the2017-0559_onco12363-sup-0001-suppinfo01.pdf [file supp_the2017-0559_onco12363-sup-0001-suppinfo01.pdf]
